# Supplementary material
Source: Research Square preprint supplement (doi:10.21203/rs.3.rs-9538329/v1)
Supplement: Supplementary file 1 [file 9f2733ae22ef89dbce2363cb.docx]

# Subthalamic Deep Brain Stimulation Restores Temporal Flexibility of Cortical Beta Bursts During Motor Inhibition

Tingting Zhua,b, Wim Vandenberghec,d, Dante Mantinie, Alexander T. Sacka,b, James P. Coxonf, Bart Nutting,h, Stephan P. Swinnene, Inge Leunissena,b*

a Department of Cognitive Neuroscience, Faculty of Psychology and Neuroscience, Maastricht University, Maastricht 6229 EV, The Netherlands

b Maastricht Brain Imaging Centre (MBIC), Maastricht University, Oxfordlaan 55, Maastricht 6229 EV, The Netherlands

c Laboratory for Parkinson Research, Department of Neurosciences, KU Leuven, 3000Leuven, Belgium

d Department of Neurology, University Hospitals Leuven, 3000 Leuven, Belgium

e Movement Control and Neuroplasticity Research Group, Department of Movement Sciences, KU Leuven, 3001 Leuven, Belgium

f School of Psychological Sciences, Turner Institute for Brain and Mental Health, Monash University, 3800 Victoria, Australia

g Research Group Experimental Neurosurgery and Neuroanatomy, Department of Neurosurgery, KU Leuven, 3000 Leuven, Belgium

h Department of Neurosurgery, University Hospital of Leuven, 3000 Leuven, Belgium

*Corresponding author

Email address: [inge.leunissen@maastrichtuniversity.nl](mailto:inge.leunissen@maastrichtuniversity.nl)

# Supplementary material

Table S1. Deep brain stimulation parameters for patients with Parkinson’s disease

| **Participant ID** | **Session** | **STN-contacts (L/R)** | **Electrical potential (V)** | **Pulse width (µs)** | **Frequency (Hz)** | **Impedance (Ω)** | **Current amplitude (mA)** |
| --- | --- | --- | --- | --- | --- | --- | --- |
| 1* | pre | 2–c+/10–c+ | 2.6/2.45 | 60/60 | 130/130 | 1726/1275 | 1.48/1.97 |
| post | 2–c+/10–c+ | 2.85/2.7 | 60/60 | 130/130 | 1805/1218 | 1.61/2.26 |
| 2# | pre | 2+3–/10+11– | 3.5/3.45 | 90/90 | 110/110 | –/– | –/– |
| post | 2+3–/10+11– | 3.45/3.45 | 90/90 | 110/110 | 1284/1397 | 2.71/2.51 |
| 3# | pre | 1+2–/10–9+ | 3.65/3.75 | 80/80 | 110/110 | –/– | –/– |
| post | 1+2–/10–9+ | 3.65/3.75 | 80/80 | 110/110 | –/– | –/– |
| 4# | pre | 1+2–/9–10+ | 2.5/2.5 | 60/70 | 130/130 | 2262/2181 | 0.83/1.35 |
| post | 1+2–/9–10+ | 2.5/2.5 | 60/70 | 130/130 | 1703/2496 | 1.49/1.02 |
| 5# | pre | 2–3+/10+11– | 2.6/4.9 | 70/130 | 130/130 | –/– | –/– |
| post | 2–3+/10+11– | 2.6/5.1 | 70/140 | 110/110 | –/– | –/– |
| 6* | pre | 2–c+/9–c+ | 1.7/1.2 | 60/60 | 130/130 | –/– | –/– |
| post | 2–c+/9–c+ | 1.9/1.3 | 60/60 | 130/130 | 1040/1216 | 1.8/1.1 |
| 7* | pre | 1–c+/9–c+ | 2/2 | 60/60 | 130/130 | 856/1268 | 2.35/1.6 |
| post | 1–c+/9–c+ | 2.3/2.3 | 60/60 | 130/130 | –/– | –/– |
| 8* | pre | 2–c+/10–c+ | 1.85/1.85 | 60/60 | 130/130 | 1260/1342 | 1.28/1.21 |
| post | 2–c+/10–c+ | 1.85/1.85 | 60/60 | 130/130 | –/– | –/– |
| 9# | pre | 2–c+/10–c+ | 3/0.6 | 60/60 | 130/130 | 1243/2315 | 2.28/0.28 |
| post | 2–c+/10–c+ | 3.4/0.4 | 60/60 | 130/130 | 1342/2200 | 2.6/0.2 |
| 10* | pre | 1–c+/9–c+ | 3.5/1.95 | 90/60 | 130/– | –/– | –/– |
| post | 1–c+/9–c+ | 3.7/1.9 | 90/60 | 130/130 | –/– | –/– |
| 11* | pre | 2–c+/9+10– | 3.8/4.4 | 60/80 | 130/130 | 1531/1518 | 2.5/2.7 |
| post | 2–c+/9+10– | 3.8/4.4 | 60/80 | 130/130 | 1564/1500 | 2.5/2.9 |
| 12# | pre | contacts 2–4 (34/33/33%)/contacts 2–4 (20–13%) | 0.9/– | 60/90 | 130/130 | –/– | –/1.3 |
| post | contacts 10–15 (34/33/33%)/contacts 10–15 (20–13%) | 1.2/– | 60/90 | 130/130 | –/– | –/1.6 |
| 13* | pre | 1–2–c+/9–10–c+ | 3.3/3.3 | 60/60 | 130/130 | 2076/2072 | 1.6/1.6 |
| post | 2–c+/10–c+ | 3.45/3.45 | 90/90 | 110/110 | 1776/2003 | 2/1.8 |
| 14* | pre | 3–c+/9–c+ | 1.9/1.8 | 60/60 | 125/125 | –/– | –/– |
| pre-R2 | –/10–c+ | –/2.2 | –/90 | –/125 | –/– | –/– |
| post | 3–c+/9–c+ | 1.9/1.8 | 60/60 | 125/125 | 1303/1215 | 1.5/1.5 |
| post-R2 | –/10–c+ | –/2.2 | –/90 | –/125 | –/1304 | –/1.7 |
| Mean |  | – | 2.69/2.62 | 67.50/75.33 | 125.36/125.17 | 1518.07/1657.50 | 1.90/1.58 |
| STD |  | – | 0.84/1.22 | 12.06/20.63 | 8.27/8.07 | 381.21/462.85 | 0.56/0.73 |
| Range |  | – | 0.90–3.80 / 0.40–5.10 | 60–90 / 60–140 | 110–130 / 110–130 | 856–2262 / 1215–2496 | 0.83–2.71 / 0.20–2.90 |

*Bipolar stimulation; #Monopolar stimulation. All parameters are presented in the order of left/right subthalamus nucleus (L/R STN) across columns. Participant 14 had two right STN electrodes, where the second right electrode was added in a single row.


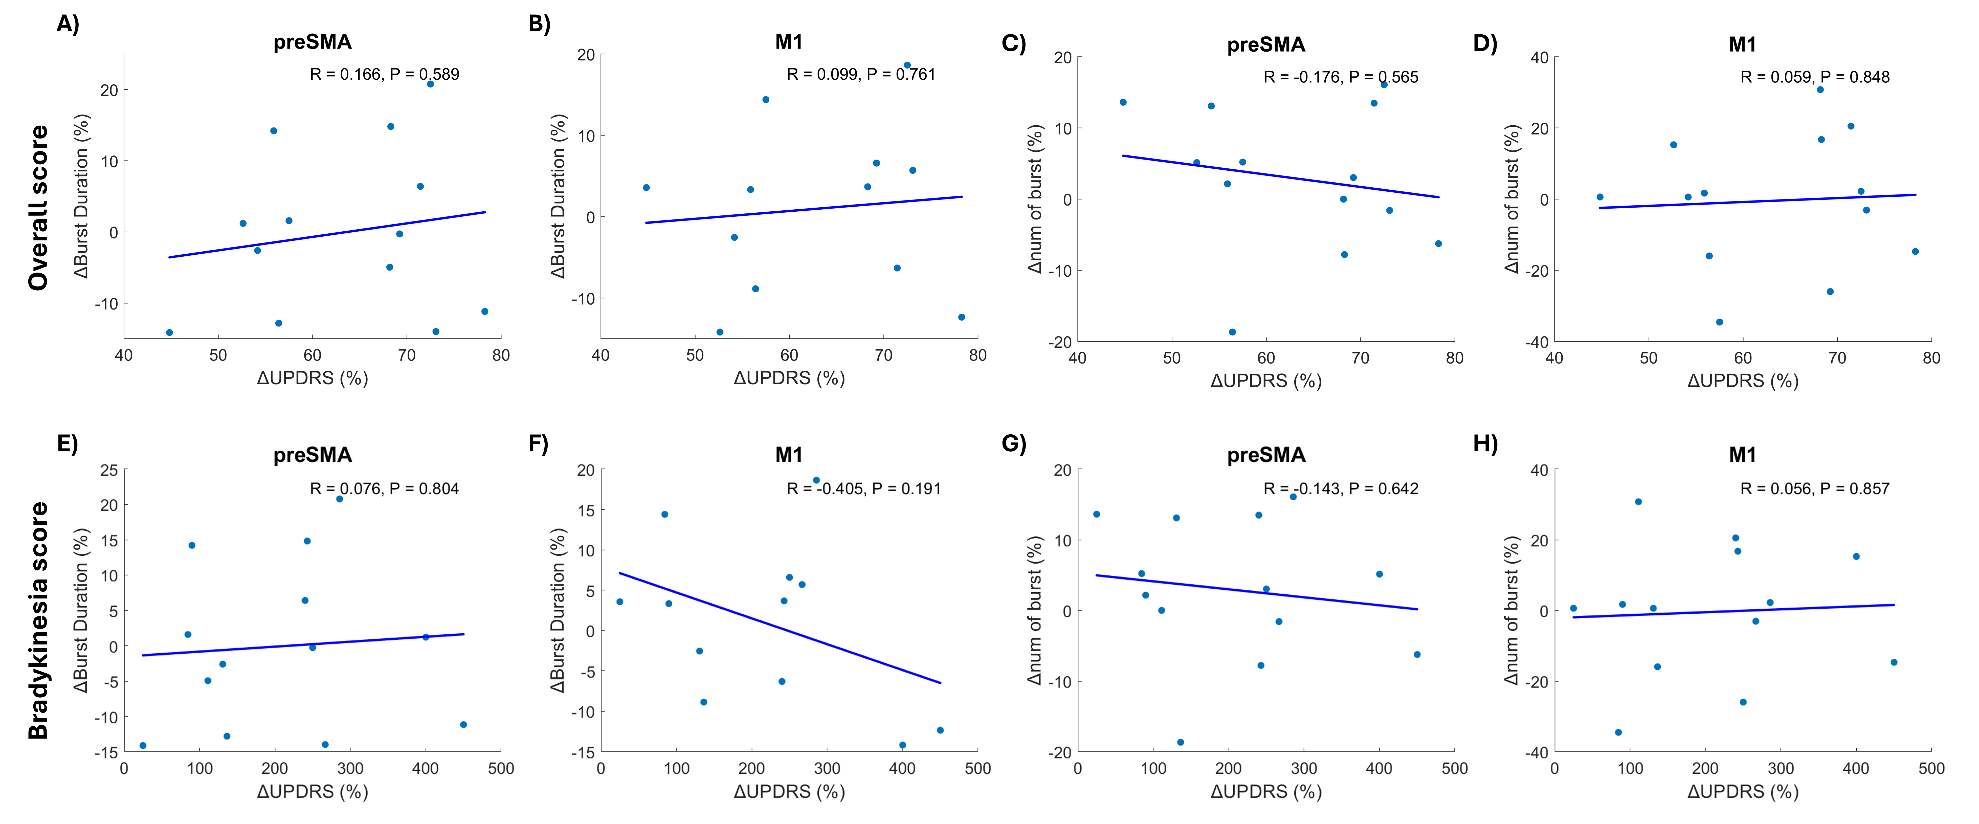


Figure S1. Correlation between beta burst properties and clinical symptom severity. The correlation was displayed for A-D) overall Unified Parkinson’s Disease Rating Scale III (UPDRS) and E-H) bradykinesia sub-score.
